# Supplementary material
Source: PubMed Central journal article supplement (PMC4618253)

# TOC

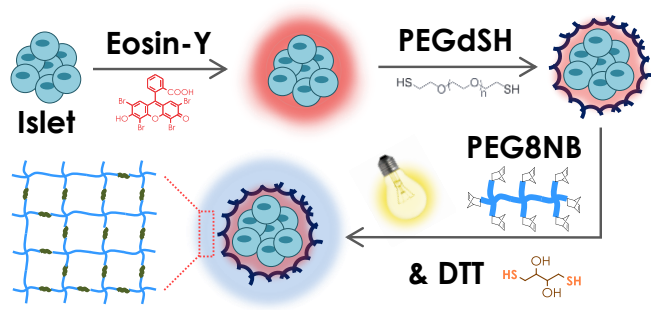

Supplement: NIHMS643903-supplement-Graphical_Abstract.pdf [file NIHMS643903-supplement-Graphical_Abstract.pdf]
